# Supplementary material
Source: PubMed Central journal article supplement (PMC6705244)
Supplement: ao9b01359_si_001.pdf [file ao9b01359_si_001.pdf]

## Supplementary Materials

# Improving Quantum Capacitance of Graphene-Based Supercapacitors by the Doping and Co-doping: A First Principles Calculations

Qiang Xu<sup>a,b</sup>, Guangmin Yang<sup>c,\*</sup>, Xiaofeng Fan<sup>a,\*</sup>, Weitao Zheng<sup>a</sup>

<sup>a</sup> Key Laboratory of Automobile Materials (Jilin University), Ministry of Education, and College of Materials Science and Engineering, Jilin University, Changchun, 130012, China

<sup>b</sup> College of Prospecting and Surveying Engineering, Changchun Institute of Technology, Changchun, 130032, China

<sup>c</sup> College of Physics, Changchun Normal University, Changchun, 130032, China

\*Correspondence and requests for materials should be addressed, [xffan@jlu.edu.cn](mailto:xffan@jlu.edu.cn) (X. Fan); [yangguangmin@mail.cncnc.edu.cn](mailto:yangguangmin@mail.cncnc.edu.cn) (G. M. Yang)

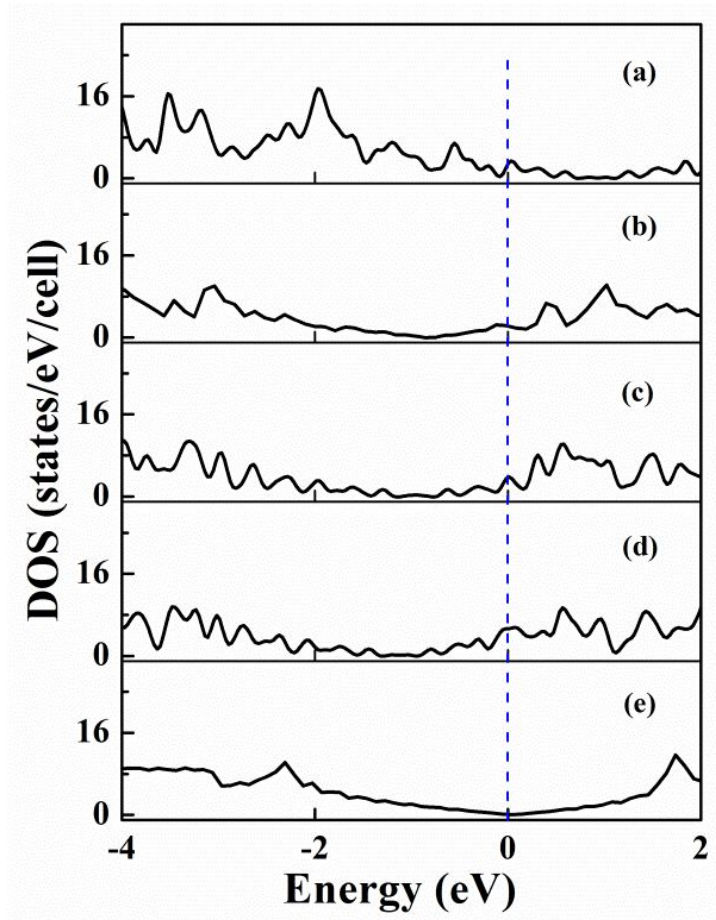

Figure S1. (a)-(e) Density of states (DOS) of quaternary B(N, P, S)-doped graphene, and pristine graphene, corresponding to Figure 1(a) with doping concentrations of 3.1%. Note that the total DOS are the sum of spin-up and spin-down bands.

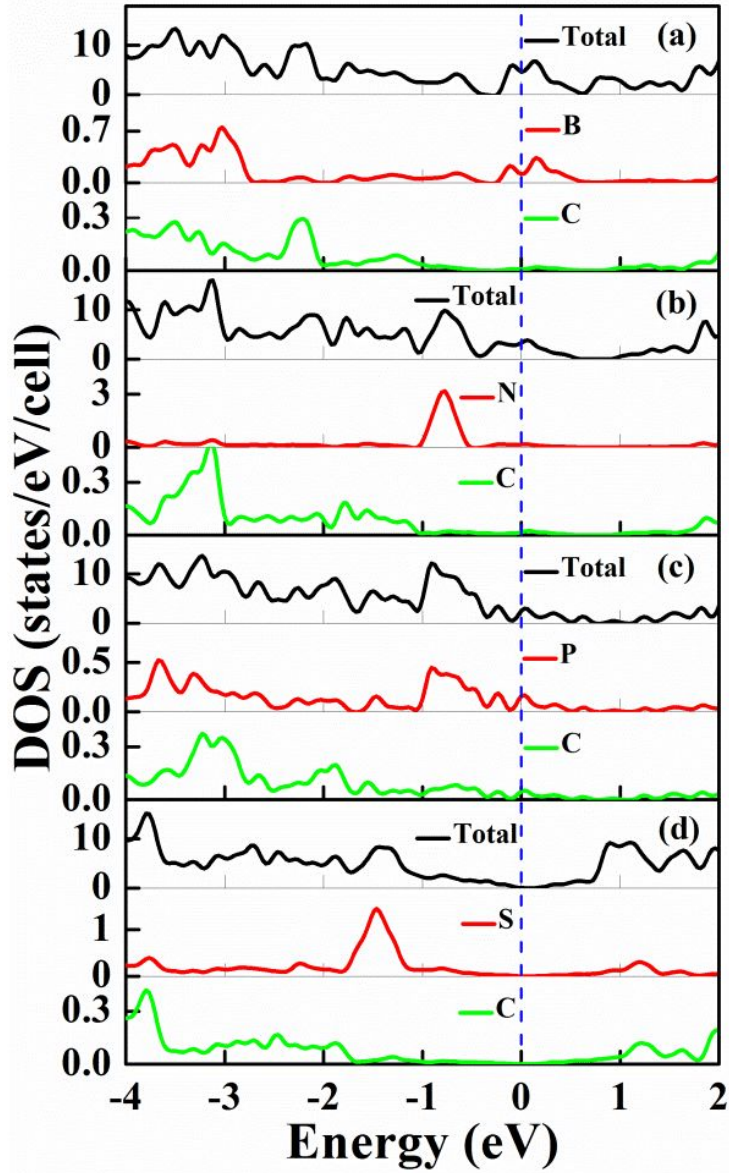

Figure S2. (a)-(d) Density of states (DOS) and local density of states (LDOS) of B, N, P and S of defected graphene model in Figure 1(b) with doping concentrations of 3.1%. Note that the total DOS and LDOS are the sum of spin-up and spin-down bands.

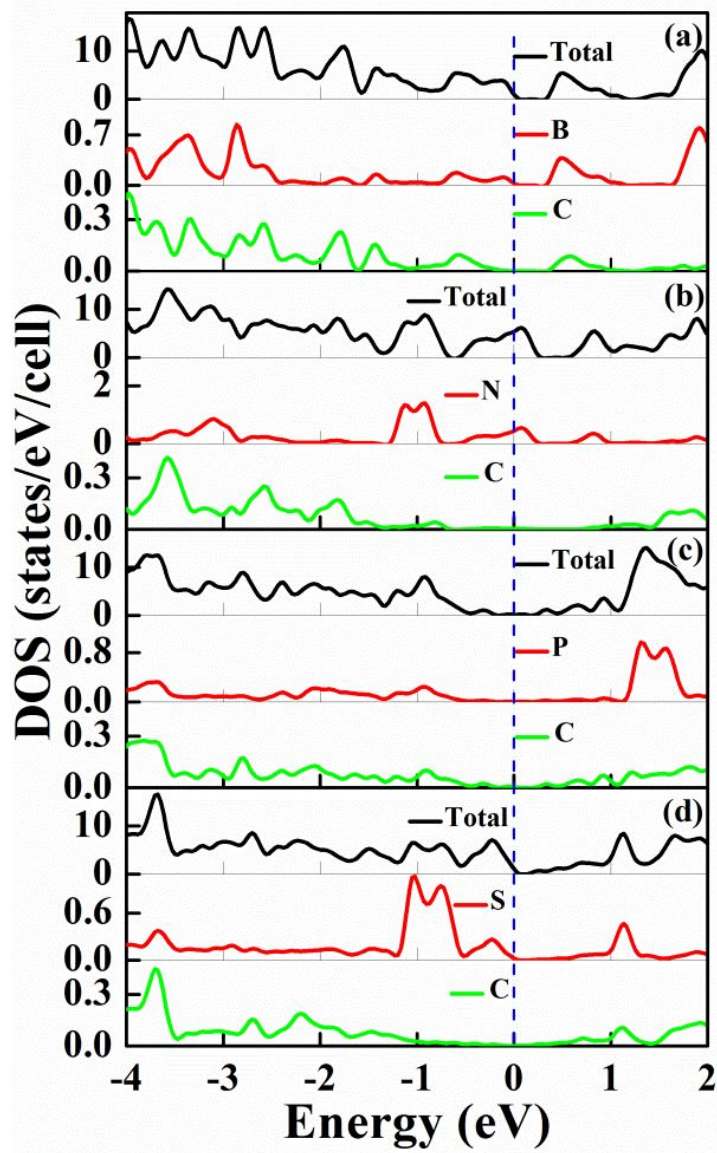

Figure S3. (a)-(d) Density of states (DOS) and local density of states (LDOS) of B, N, P and S of defected graphene model in Figure 1(c) with doping concentrations of 6.2%. Note that the total DOS and LDOS are the sum of spin-up and spin-down bands.

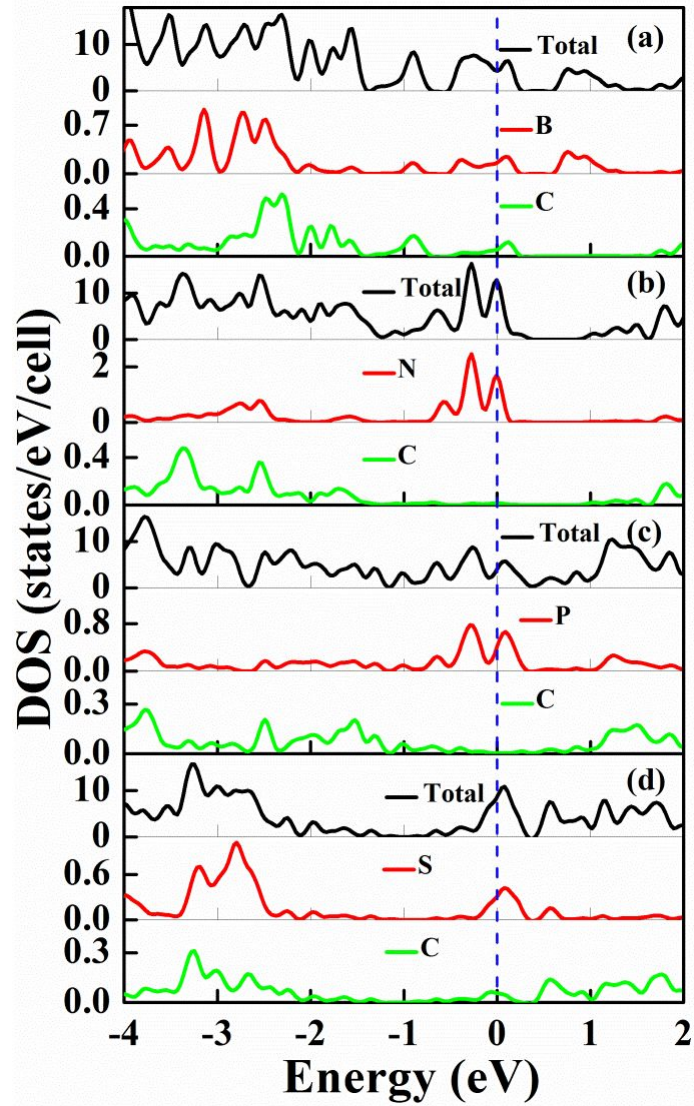

Figure S4. (a)-(d) Density of states (DOS) and local density of states (LDOS) of B, N, P and S of defected graphene model in Figure 1(d) with doping concentrations of 9.4%. Note that the total DOS and LDOS are the sum of spin-up and spin-down band.

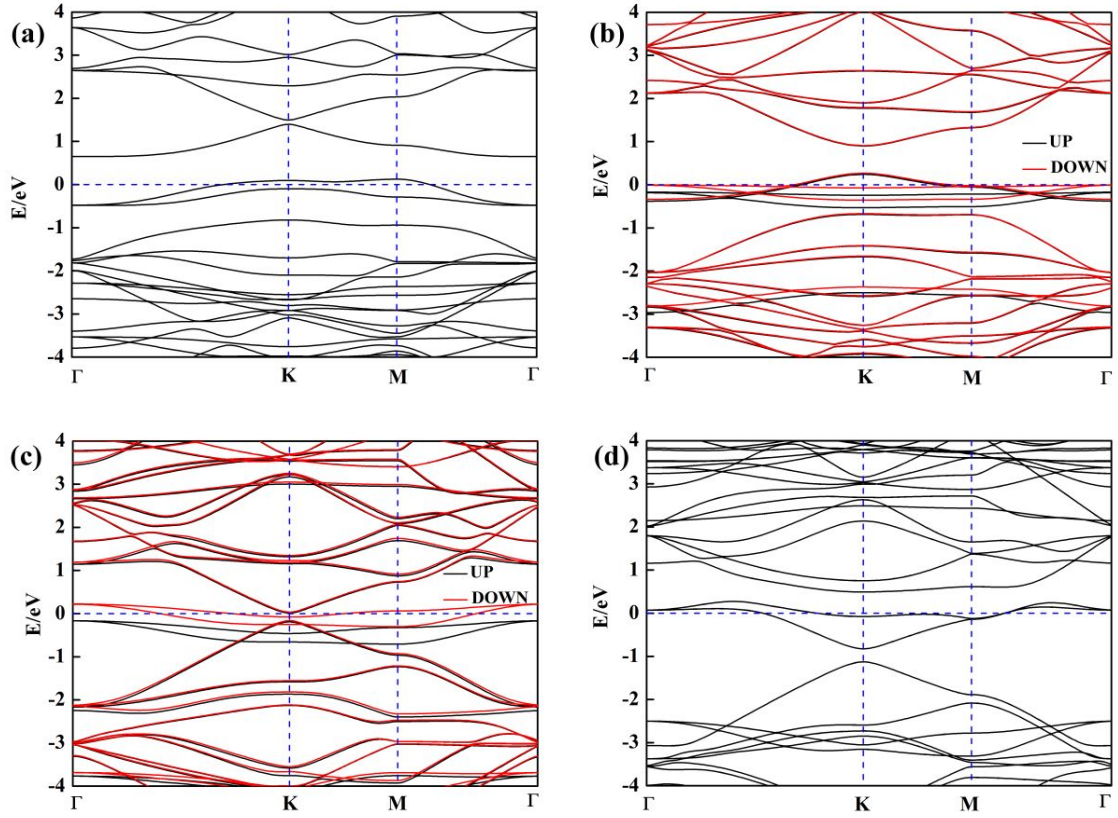

Figure S5. (a)-(d) The spin-up and spin-down band structures of B, N, P and S doping graphene model in Figure 1(d) with doping concentrations of 9.4%.

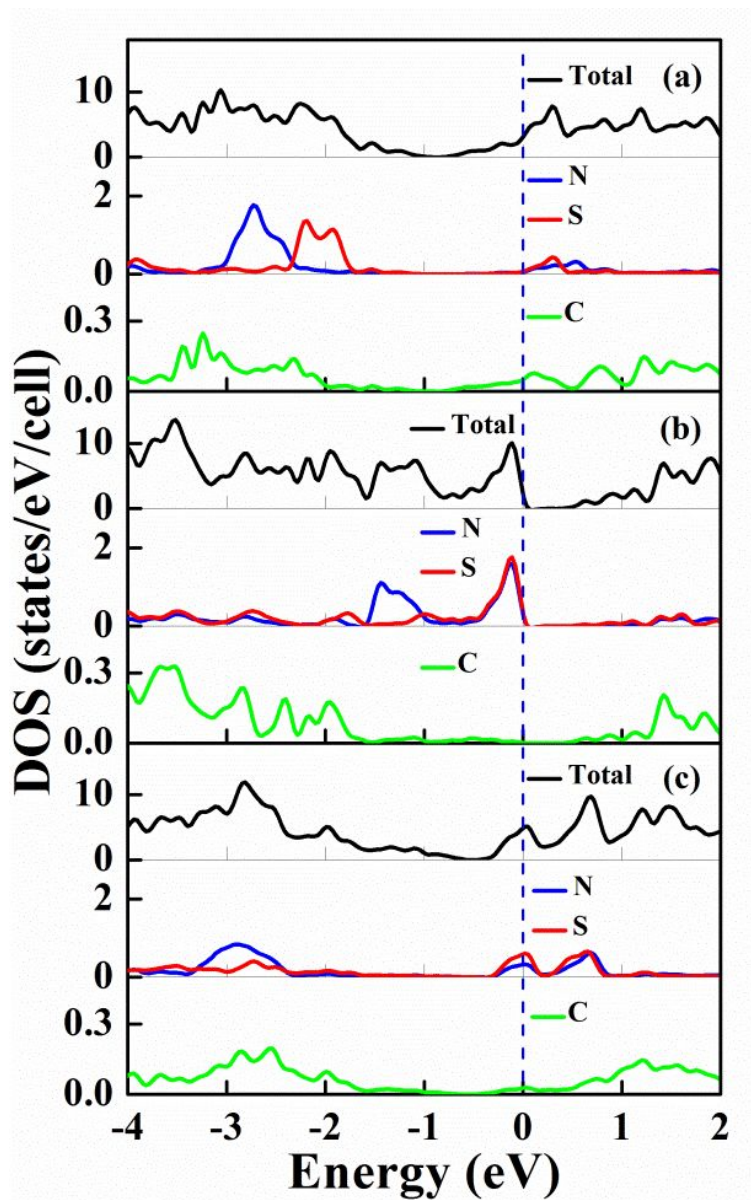

Figure S6. Density of states (DOS) and local density of states (LDOS) of defected graphene model in Figure 1(e)-(g) with N/S co-doping including (a) NSS, (b) NNS, (c) NS.

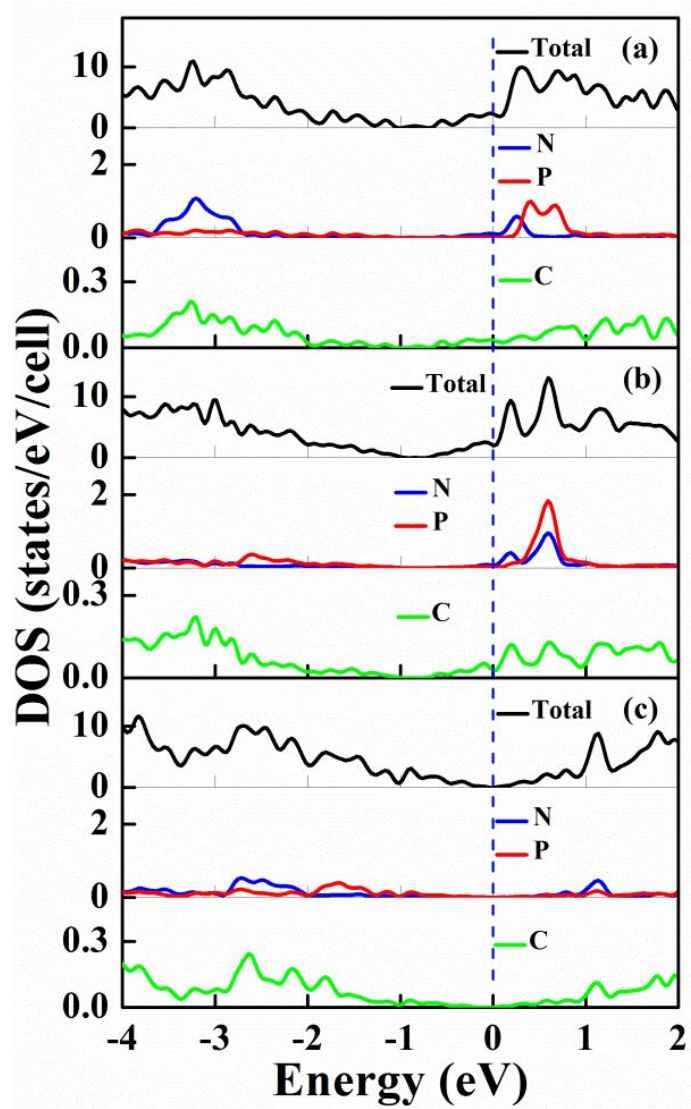

Figure S7. Density of states (DOS) and local density of states (LDOS) of defected graphene models in Figure 1(e)-(g) with N/P co-doping including (a) NPP, (b) NNP, (c) NP.



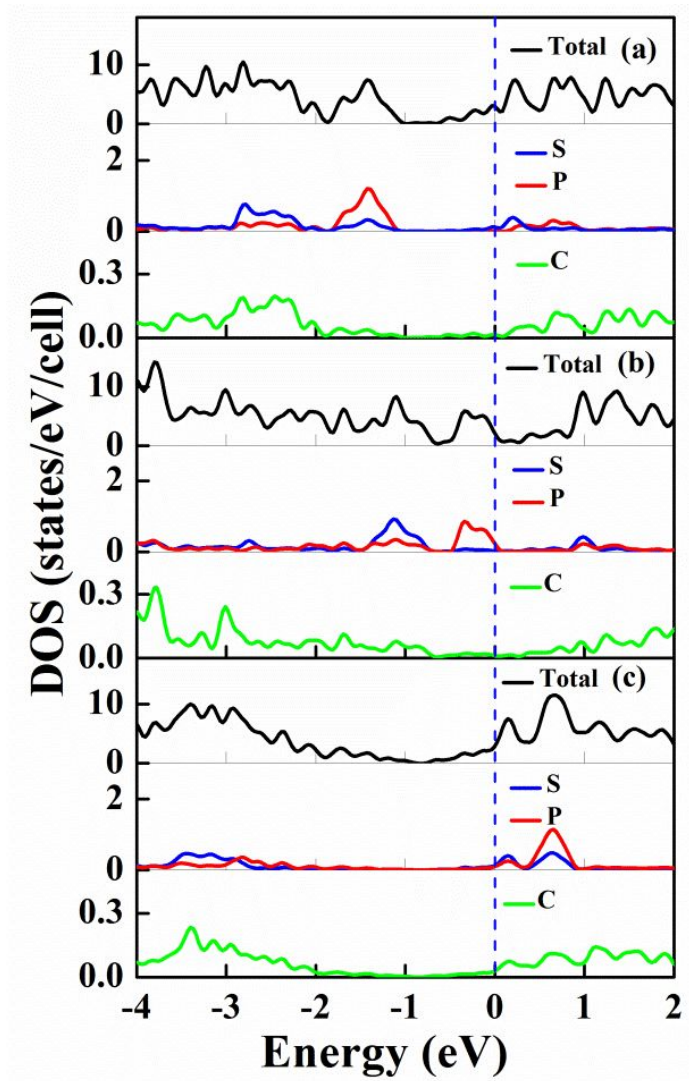

Figure S8. Density of states (DOS) and local density of states (LDOS) of defected graphene models in Figure 1(e)-(g) with P/S co-doping including (a) PSS, (b) PPS, (c) PS.

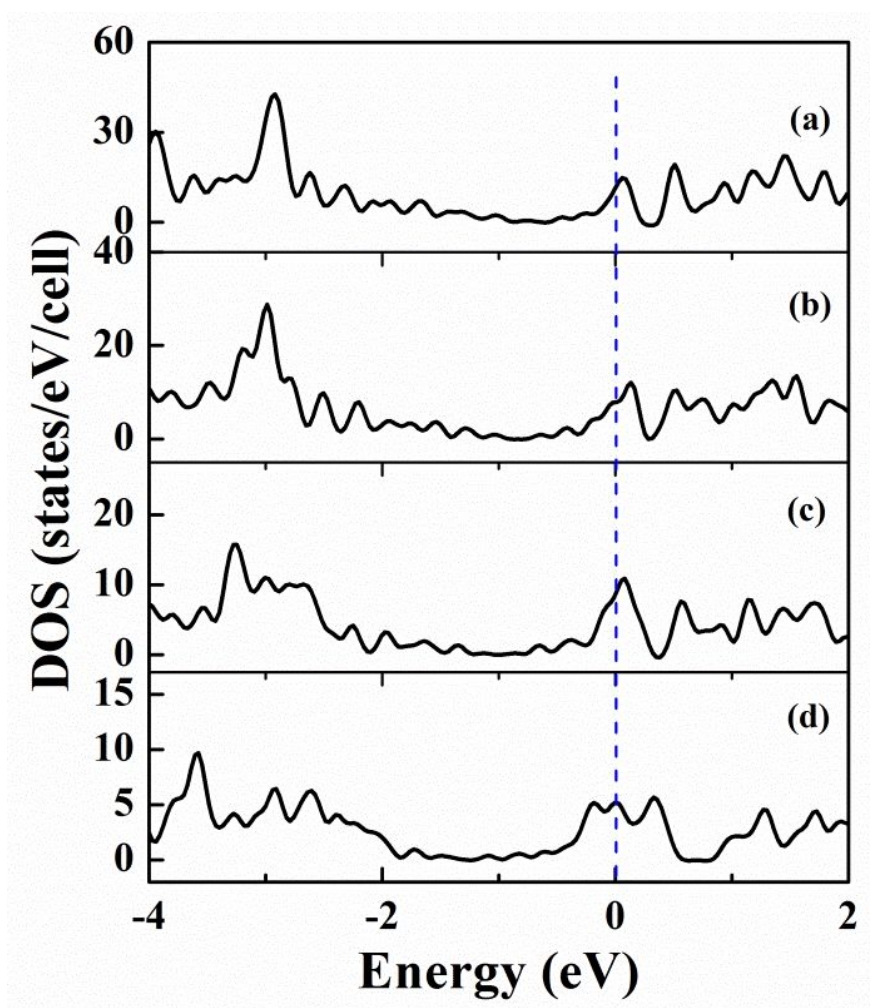

Figure S9. Density of states (DOS) of defected graphene model in Figure 1(d) with different triple S-doping concentrations including (a) 4.2%, (b) 6%, (c) 9.4%, and (d) 16.7%.

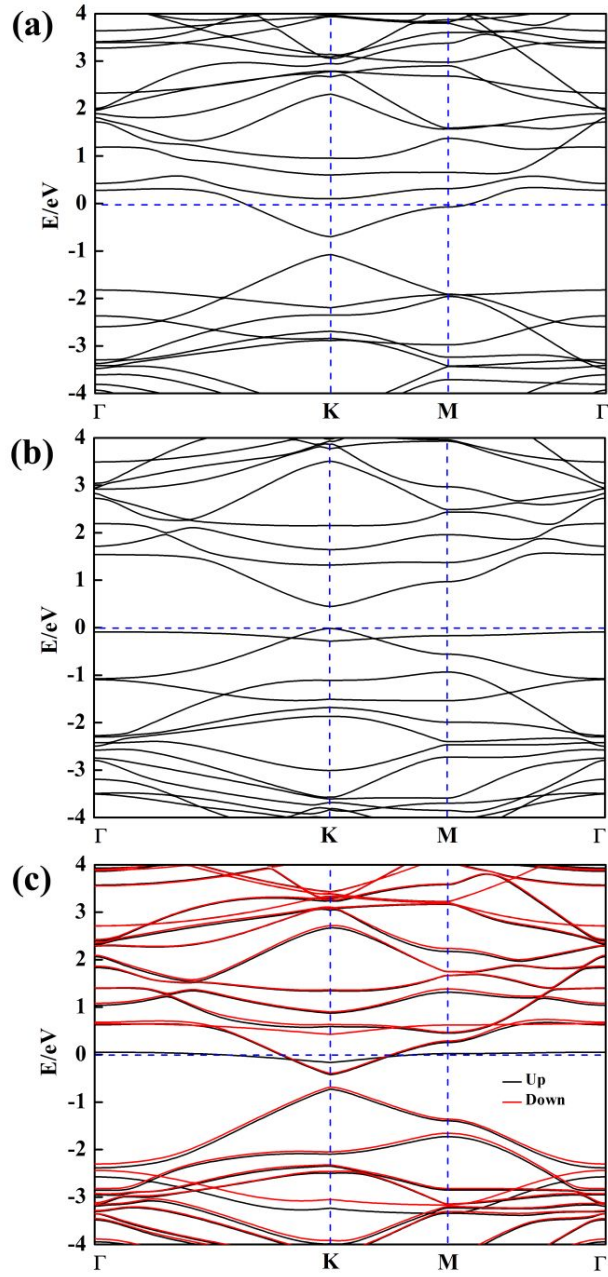

Figure S10. The spin-up and spin-down band structures of defected graphene model in Figure 1(e)-(g) with N/S co-doping including (a) NSS, (b) SNN, (c) NS.

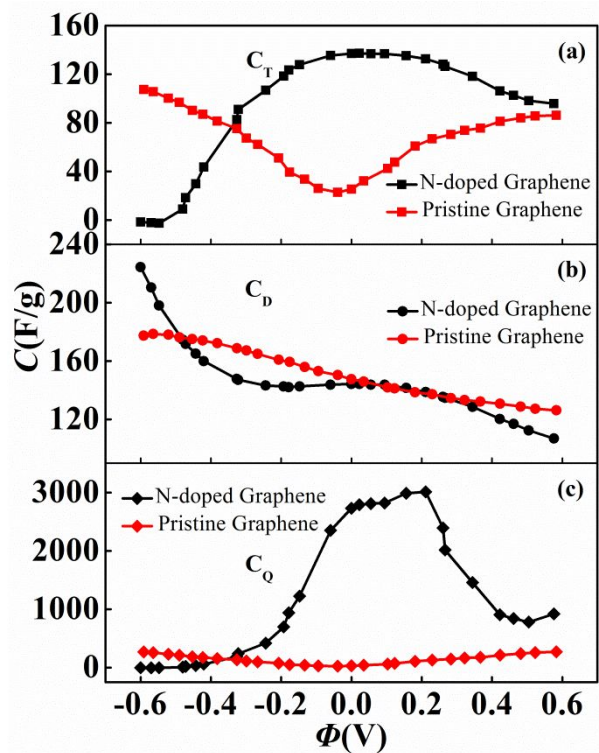

Figure S11. (a) Total interfacial capacitance ( $C_T$ ), (b) Electric double-layer capacitance ( $C_D$ ), and (c) quantum capacitance ( $C_Q$ ) of nitrogen-doped and pristine graphene. The  $C_D$  capacitance is obtained from classical MD simulation for the 1 M NaCl aqueous electrolyte<sup>23</sup>.

The formation energies of doped graphene for the four ways of doping in Figure 1 are calculated by the formulas,

$$\Delta E_{q-N(B,P,S)}(x) = E_{df-G}(x) - (n-1)\mu_C - \mu_{N(B,P,S)} \quad (1)$$

$$\Delta E_{1-N(B,P,S)}(x) = E_{df-G}(x) - (n-1)\mu_C - \mu_{N(B,P,S)} \quad (2)$$

$$\Delta E_{2-N(B,P,S)}(x) = E_{df-G}(x) - (n-2)\mu_C - 2\mu_{N(B,P,S)} \quad (3)$$

$$\Delta E_{3-N(B,P,S)}(x) = E_{df-G}(x) - (n-3)\mu_C - 3\mu_{N(B,P,S)} \quad (4)$$

where  $\Delta E_{q-N(B,P,S)}(x)$ ,  $\Delta E_{3-N(B,P,S)}(x)$ ,  $\Delta E_{2-N(B,P,S)}(x)$ , and  $\Delta E_{1-N(B,P,S)}(x)$  were the formation energies of quaternary-N (B, P and S) doping, single pyridine-B(N, P and S) doping, double pyridine-B(N, P and S) doping and triple pyridine-B(N, P and S) doping in Figure 1(a)-(d), respectively.  $E_{df-G}(x)$  was the total energy of defect graphene with  $n$  atoms for seven types of doping graphene including the co-doping ways in Figure 1(e)-(g).  $\mu_C$ ,  $\mu_N$ ,  $\mu_B$ ,  $\mu_P$  and  $\mu_S$  represented the total energies per atom of pristine graphene,  $N_2$  molecules,  $B_{12}$ ,  $P_4$  and  $S_8$ , respectively.  $N_2$  molecules, bulk  $B_{12}$ , bulk  $P_4$  and bulk  $S_8$  are chosen to be as the reference states because they are the low-energy ground states of S, P, B and N, respectively. All the results were obtained with the supercells  $P(4 \times 4)$  in Figure 1.

**Table S1.** Calculated parameters for B, N, P and S doping graphene with the models (a-g) in Figure 1, including X-X(C) bond distance, C-X-C bond angle, formation energy  $\Delta E_f$ , charges located on adatom ( $\rho^B$ ) and C atom obtained with Bader charge analysis.

| System  | Dopants (X) | $d(C-X)$ Å | $d(X-X)$ Å | C-X-C (deg) | $\Delta E_f$ (eV) | $\rho^B$ charge (e) | Average of C charge(e) | $(C_Q)_{max}$ ( $\mu F/cm^2$ ) |
|---------|-------------|------------|------------|-------------|-------------------|---------------------|------------------------|--------------------------------|
| Model-a | B           | 1.48       | -          | 120.01      | 1.25              | +1.89               | -0.06                  | 55.1                           |
|         | N           | 1.41       | -          | 120.01      | 0.89              | -1.26               | +0.04                  | 58.5                           |
|         | P           | 1.61       | -          | 120.01      | 3.74              | +2.47               | -0.08                  | 90.3                           |
|         | S           | 1.62       | -          | 120.01      | 4.34              | +0.19               | -0.006                 | 81.2                           |
| Model-b | B           | 1.52       | -          | 110.51      | 6.53              | +1.52               | -0.05                  | 58.2                           |
|         | N           | 1.33       | -          | 122.05      | 5.31              | -1.16               | +0.04                  | 32.8                           |
|         | P           | 1.85       | -          | 88.91       | 3.62              | +1.93               | -0.06                  | 26.4                           |
|         | S           | 1.63       | -          | 108.93      | 6.04              | +0.58               | -0.02                  | 12.8                           |
| Model-c | B           | 1.49       | 2.27       | 114.92      | 5.29              | +1.49               | -0.11                  | 49.6                           |
|         | N           | 1.35       | 2.64       | 121.71      | 4.95              | -1.19               | +0.08                  | 54.5                           |
|         | P           | 1.69       | 1.92       | 105.83      | 5.69              | +1.51               | -0.11                  | 9.2                            |

|                |   |      |           |        |      |       |        |       |
|----------------|---|------|-----------|--------|------|-------|--------|-------|
|                | S | 1.66 | 2.11      | 105.08 | 4.06 | +0.55 | -0.04  | 62.9  |
| Model-d        | B | 1.52 | 2.16      | 111.36 | 4.66 | +1.35 | -0.14  | 70.9  |
|                | N | 1.34 | 2.54      | 122.15 | 3.73 | -1.19 | +0.13  | 118.4 |
|                | P | 1.67 | 2.11      | 107.58 | 7.77 | +1.36 | -0.15  | 75.3  |
|                | S | 1.64 | 2.21      | 110.17 | 3.71 | +0.51 | -0.05  | 93.5  |
| Model-e<br>NNS | S | 1.68 | 2.28(S-N) | 102.41 | 1.79 | +2.94 | +0.09  | 83.3  |
|                | N | 1.34 | 2.68(N-N) | 123.91 |      | -2.75 |        |       |
|                | N | 1.34 |           |        |      | -2.75 |        |       |
| Model-f<br>NSS | N | 1.35 | 2.37(N-S) | 123.19 | 2.57 | -2.71 | -0.04  | 67.1  |
|                | S | 1.63 | 2.21(S-S) | 108.63 |      | +1.83 |        |       |
|                | S | 1.66 |           |        |      | +1.94 |        |       |
|                |   |      |           |        |      |       |        |       |
| Model-g<br>NS  | S | 1.88 | 2.13(S-N) | 94.52  | 3.13 | +0.49 | +0.07  | 44.9  |
|                | N | 1.35 |           | 122.77 |      | -2.55 |        |       |
|                | - | -    |           | -      |      | -     |        |       |
| Model-e<br>NPP | N | 1.37 | 2.59(N-N) | 117.89 | 2.93 | -2.83 | +0.023 | 75.4  |
|                | N | 1.44 |           | 117.89 |      | -2.81 |        |       |
|                | P | 1.80 | 1.89(N-P) | 92.91  |      | +4.99 |        |       |
| Model-f<br>NPP | N | 1.36 | 2.38(N-P) | 120.83 | 4.81 | -2.65 | -0.14  | 90.9  |
|                | P | 1.69 | 1.96(P-P) | 108.72 |      | +3.23 |        |       |
|                | P | 1.67 |           |        |      | +3.31 |        |       |
| Model-g<br>NP  | N | 1.38 | 1.99(N-P) | 119.38 | 2.45 | -2.78 | -0.076 | 8.1   |
|                | P | 1.83 |           | 93.05  |      | +4.99 |        |       |
|                | - | -    |           | -      |      | -     |        |       |
| Model-e<br>PPS | P | 1.66 | 2.13(P-P) | 107.60 | 6.06 | +2.82 | -0.29  | 53.1  |
|                | P | 1.66 |           | 107.60 |      | +2.80 |        |       |
|                | S | 1.66 | 2.11(P-S) | 105.48 |      | +2.56 |        |       |
| Model-f<br>PSS | P | 1.65 | 2.16(P-S) | 109.06 | 4.72 | +3.01 | -0.31  | 62.6  |
|                | S | 1.65 | 2.15(S-S) | 107.78 |      | +2.80 |        |       |
|                | S | 1.65 |           | 107.78 |      | +2.85 |        |       |
| Model-g<br>PS  | P | 1.79 | 2.07(P-S) | 97.34  | 4.78 | +4.99 | -0.22  | 63.3  |
|                | S | 1.62 |           | 113.99 |      | +1.26 |        |       |
|                | - | -    |           | -      |      | -     |        |       |
